# Supplementary material for: A reusable fluorescent sensor from electrosynthesized water-soluble oligo(1-pyrenesulfonic acid) for effective detection of Fe3+
Source: Royal Society of Chemistry journal article supplement (doi:10.1039/c8nj05000g), 2018-01-01
Supplement: c8nj05000g1.pdf [file c8nj05000g1.pdf]

Electronic Supplementary Information on the New Journal of Chemistry  
publication entitled

**A reusable fluorescent sensor from electrosynthesized water-soluble  
oligo(1-pyrenesulfonic acid) for effective detection of Fe<sup>3+</sup>**

Nannan Jian<sup>§a</sup>, Kaiwen Lin<sup>§a</sup>, Bin Guo<sup>b</sup>, Ge Zhang<sup>a</sup>, Ximei Liu<sup>c</sup>, Lie Zou<sup>c</sup>,  
Baoyang Lu<sup>\*c</sup>, Jingkun Xu<sup>\*a,d</sup>

*<sup>a</sup>School of Chemistry & Chemical Engineering, Jiangxi Science &  
Technology Normal University, Nanchang 330013, Jiangxi, PR China;*

*<sup>b</sup>College of Science, Nanjing Forestry University, Nanjing 210037,  
Jiangsu, PR China;*

*<sup>c</sup>School of Pharmacy, Jiangxi Science & Technology Normal University,  
Nanchang 330013, Jiangxi, PR China;*

*<sup>d</sup>School of Chemistry and Molecular Engineering, Qingdao University of  
Science and Technology, Qingdao 266042, Shandong, PR China.*

\*: Corresponding authors. Email: [lby1258@163.com](mailto:lby1258@163.com)  
and [xujingkun1971@yeah.net](mailto:xujingkun1971@yeah.net)

§These authors contributed equally to this work.

**The file includes:**

**Fig. S1**  $^1\text{H}$  NMR of 1-pyrenesulfonic acid.

**Fig. S2** Chronoamperometric curves of  $0.01 \text{ mol L}^{-1}$  1-pyrenesulfonic acid on a Pt working electrode in BFEE at different applied potentials as indicated ( $\Delta E = 0.05 \text{ V}$ ) for 500 s.

**Fig. S3** SEM images of (A) dedoped and (B) doped oligo(1-pyrenesulfonic acid) films. Magnification:  $\times 50\,000$ .

**Fig. S4** FT-IR spectra of 1-pyrenesulfonic acid (a) and oligo(1-pyrenesulfonic acid) (b).

**Fig. S5** The degradation properties of oligo(1-pyrenesulfonic acid) from 300 to 1100 K.

**Fig. S6** The fluorescence emission spectra of 1-pyrenesulfonic acid ( $1.00 \times 10^{-3} \text{ M}$ ) in the deionized water with successive addition of  $\text{Fe}^{3+}$ : (1) blank; (2)  $3.00 \times 10^{-6} \text{ M}$ ; (3)  $5.17 \times 10^{-4} \text{ M}$ ; (4)  $1.26 \times 10^{-3} \text{ M}$ ; (5)  $1.85 \times 10^{-3} \text{ M}$ ; (6)  $2.58 \times 10^{-3} \text{ M}$ ; (7)  $2.73 \times 10^{-3} \text{ M}$ ; (8)  $2.88 \times 10^{-3} \text{ M}$ ; (9)  $3.03 \times 10^{-3} \text{ M}$ ; (10)  $3.18 \times 10^{-3} \text{ M}$ ; (11)  $3.32 \times 10^{-3} \text{ M}$ ; (12)  $3.47 \times 10^{-3} \text{ M}$ ; (13)  $4.21 \times 10^{-3} \text{ M}$ ; (14)  $5.98 \times 10^{-3} \text{ M}$ ; (15)  $9.38 \times 10^{-3} \text{ M}$ ; (16)  $1.01 \times 10^{-2}$ ; (17)  $1.19 \times 10^{-2} \text{ M}$ ; (18)  $1.60 \times 10^{-2} \text{ M}$ ; (19)  $2.05 \times 10^{-2} \text{ M}$ . Inset: The  $\log(I_0/I)$  of 1-pyrenesulfonic acid sodium salt vs.  $[\text{Fe}^{3+}]$ . Excitation was 350 nm.

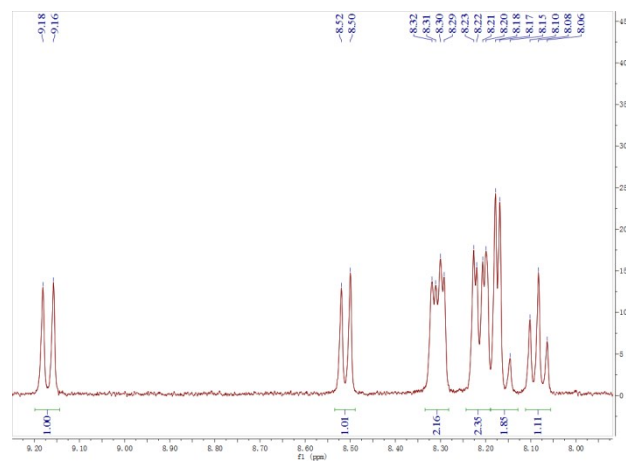

**Fig. S1**

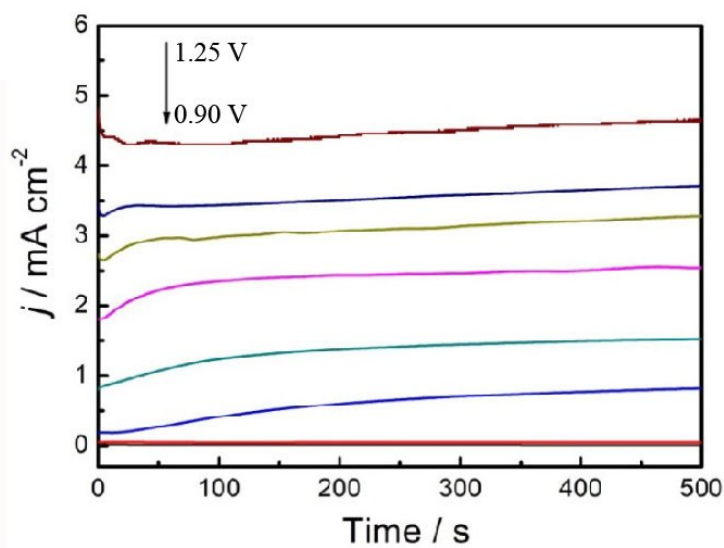

**Fig. S2**

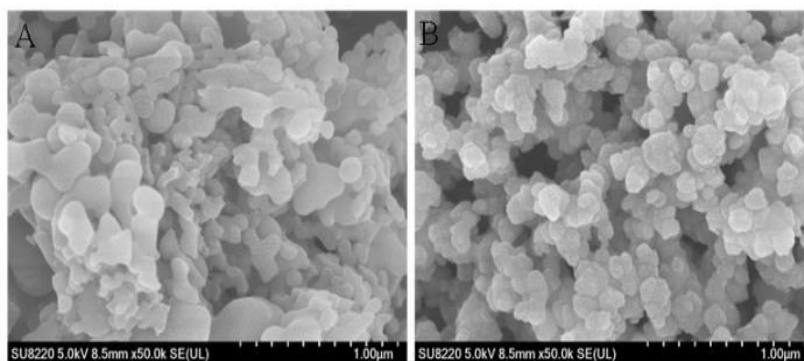

**Fig. S3**

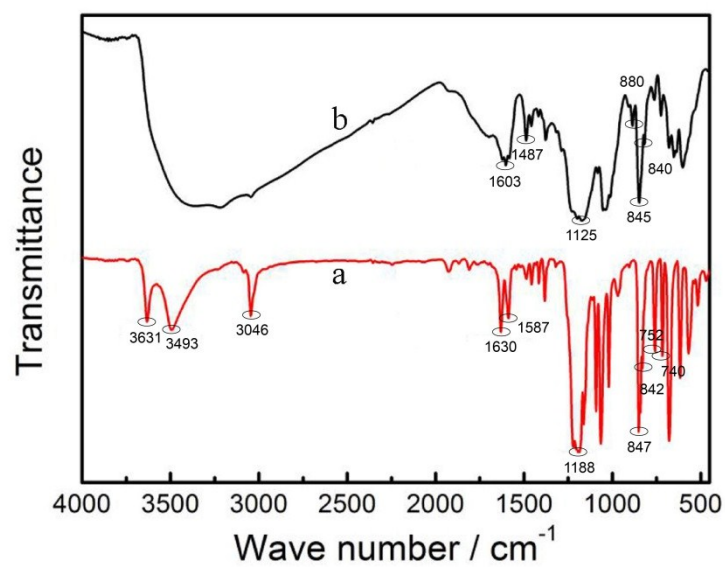

**Fig. S4**

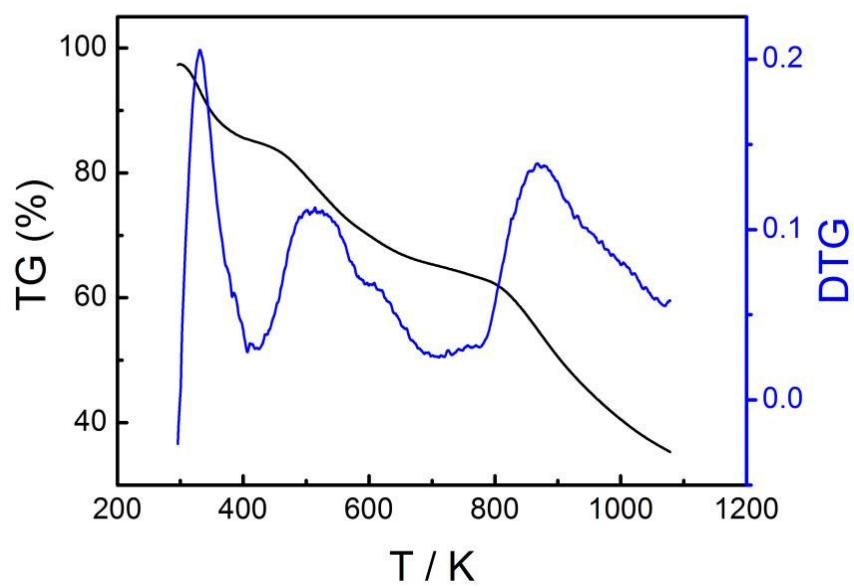

**Fig. S5**

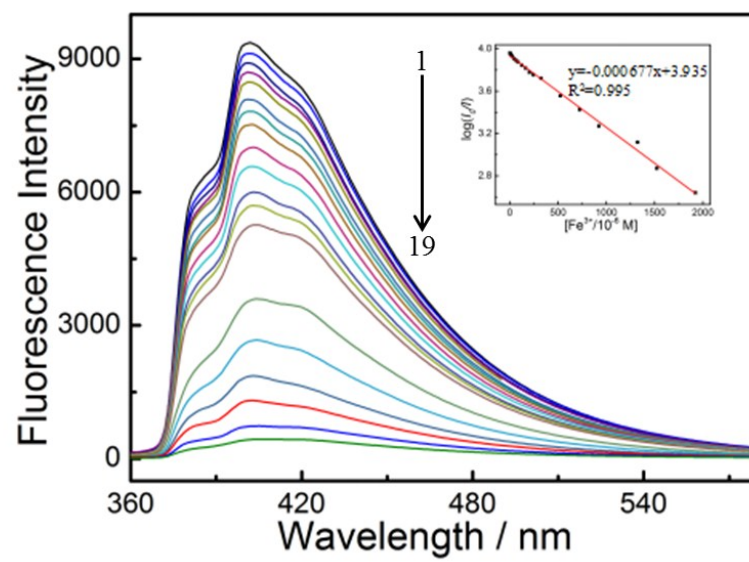

**Fig. S6**
